# Supplementary material
Source: publisher site journal article supplement (https://www.dovepress.com/article/259850)
Supplement: Supplementary file 1 [file get_supplementary_file.php]

**Supplementary Table S1** Full patient demographics and clinical characteristics before and after IPTW

|  | **Before IPTW** | | **After IPTW** | | |
| --- | --- | --- | --- | --- | --- |
|  | **UMEC/VI**  **N=4082** | **B/F**  **N=9530** | **UMEC/VI**  **N=4082** | **B/F**  **N=9529** | **ASD (%)** |
| **Age, years, mean (SD)** | 70.5 (9.8) | 70.8 (9.8) | 70.5 (9.9) | 70.7 (9.8) | 1.5 |
| **Sex, n (%)** |  |  |  |  |  |
| Male | 2188 (53.6) | 4716 (49.5) | 2077 (50.9) | 4836 (50.7) | 0.3 |
| Female | 1893 (46.4) | 4813 (50.5) | 2004 (49.1) | 4692 (49.2) | 0.3 |
| Unknown | 1 (0.0) | 1 (0.0) | 1 (0.0) | 1 (0.0) | 0.0 |
| **Insurance plan type, n (%)** |  |  |  |  |  |
| EPO | 87 (2.1) | 138 (1.4) | 68 (1.7) | 158 (1.7) | 0.0 |
| HMO | 1277 (31.3) | 3745 (39.3) | 1496 (36.7) | 3515 (36.9) | 0.5 |
| POS | 573 (14.0) | 908 (9.5) | 448 (11.0) | 1037 (10.9) | 0.3 |
| PPO | 395 (9.7) | 839 (8.8) | 373 (9.1) | 864 (9.1) | 0.2 |
| Individual | 64 (1.6) | 129 (1.4) | 56 (1.4) | 135 (1.4) | 0.4 |
| Other | 1686 (41.3) | 3771 (39.6) | 1641 (40.2) | 3820 (40.1) | 0.2 |
| **Payer, n (%)** |  |  |  |  |  |
| Commercial | 812 (19.9) | 1337 (14.0) | 643 (15.8) | 1501 (15.8) | 0.0 |
| Medicare Advantage | 3270 (80.1) | 8193 (86.0) | 3439 (84.2) | 8028 (84.2) | 0.0 |
| **Geographic region, n (%)** |  |  |  |  |  |
| Northeast | 424 (10.4) | 913 (9.6) | 398 (9.7) | 931 (9.8) | 0.1 |
| North Central | 780 (19.1) | 1935 (20.3) | 802 (19.6) | 1895 (19.9) | 0.6 |
| South | 1993 (48.8) | 4285 (45.0) | 1896 (46.5) | 4399 (46.2) | 0.6 |
| West | 878 (21.5) | 2365 (24.8) | 976 (23.9) | 2276 (23.9) | 0.1 |
| Unknown | 7 (0.2) | 32 (0.3) | 10 (0.2) | 27 (0.3) | 0.9 |
| **Quan-Charlson Comorbidity Index, mean (SD)** | 3.3 (2.7) | 3.2 (2.7) | 3.2 (2.7) | 3.2 (2.7) | 0.1 |
| **Unique medications, mean (SD)** | 10.2 (6.3) | 10.4 (6.5) | 10.4 (6.5) | 10.4 (6.4) | 1.2 |
| Median (Q1, Q3) | 9 (6, 14) | 9 (6, 14) | 9 (6, 14) | 9 (6, 14) |  |
| **Unique medications, n (%)** |  |  |  |  |  |
| 0 | 67 (1.6) | 269 (2.8) | 95 (2.3) | 234 (2.5) | 0.8 |
| 1─2 | 221 (5.4) | 574 (6.0) | 231 (5.7) | 556 (5.8) | 0.7 |
| 3─4 | 402 (9.8) | 914 (9.6) | 390 (9.5) | 918 (9.6) | 0.3 |
| ≥5 | 3392 (83.1) | 7773 (81.6) | 3366 (82.5) | 7821 (82.1) | 1.0 |
| **Fills for respiratory medications, n (%)** |  |  |  |  |  |
| Any fills for rescue medications | 1709 (41.9) | 3878 (40.7) | 1682 (41.2) | 3920 (41.1) | 0.1 |
| SABA | 1501 (36.8) | 3328 (34.9) | 1460 (35.8) | 3379 (35.5) | 0.6 |
| SAMA | 58 (1.4) | 186 (2.0) | 55 (1.3) | 185 (1.9) | 4.8 |
| SABA/SAMA | 328 (8.0) | 874 (9.2) | 345 (8.5) | 863 (9.1) | 2.1 |
| Other respiratory medications |  |  |  |  |  |
| Methylxanthines | 14 (0.3) | 35 (0.4) | 12 (0.3) | 36 (0.4) | 1.4 |
| PDE-4 inhibitors | 5 (0.1) | 6 (0.1) | 3 (0.1) | 7 (0.1) | 0.0 |
| Oral corticosteroids | 894 (21.9) | 2132 (22.4) | 912 (22.4) | 2122 (22.3) | 0.2 |
| **Rescue medication units, mean (SD)** | 1.4 (3.4) | 1.4 (3.2) | 1.4 (3.3) | 1.4 (3.2) | 0.4 |
| Median (Q1, Q3) | 0.0 (0.0, 1.0) | 0.0 (0.0, 1.0) | 0.0 (0.0, 1.0) | 0.0 (0.0, 1.0) |  |
| <6 units | 3783 (92.7) | 8875 (93.1) | 3771 (92.4) | 8877 (93.2) | 2.9 |
| ≥6 units | 299 (7.3) | 655 (6.9) | 310 (7.6) | 652 (6.8) | 2.9 |
| **COPD Severity Score, mean (SD)** | 23.4 (4.5) | 23.4 (4.6) | 23.4 (4.7) | 23.4 (4.6) | 0.6 |
| Median (Q1, Q3) | 23.1 (20.7, 25.6) | 23.0 (20.7, 25.5) | 23.0 (20.7, 25.5) | 23.0 (20.7, 25.5) |  |
| **Predicted COPD severity, n (%)** |  |  |  |  |  |
| Mild/moderate (Score ≤51.8) | 4077 (99.9) | 9515 (99.8) | 4,076 (99.9) | 9515 (99.9) | 0.5 |
| Severe (Score >51.8) | 5 (0.1) | 15 (0.2) | 5 (0.1) | 14 (0.1) | 0.5 |
| **Index fill pharmacy setting, n (%)** |  |  |  |  |  |
| Retail | 3906 (95.7) | 9113 (95.6) | 3905 (95.7) | 9113 (95.6) | 0.2 |
| Mail order | 176 (4.3) | 417 (4.4) | 177 (4.3) | 416 (4.4) | 0.2 |
| **Index fill days supplied, mean (SD)** | 36.6 (18.1) | 38.2 (19.5) | 37.7 (18.9) | 37.7 (19.2) | 0.5 |
| <90 days | 3700 (90.6) | 8525 (89.5) | 3666 (89.8) | 8557 (89.8) | 0.0 |
| ≥90 days | 382 (9.4) | 1005 (10.5) | 416 (10.2) | 972 (10.2) | 0.0 |
| **Any COPD-related ED visit, n (%)** | 50 (1.2) | 118 (1.2) | 52 (1.3) | 118 (1.2) | 0.3 |
| Number of COPD-related ED visits, mean (SD) | 0.0 (0.1) | 0.0 (0.1) | 0.0 (0.1) | 0.0 (0.1) | 0.2 |
| Median (Q1, Q3) | 0 (0, 0) | 0 (0, 0) | 0 (0, 0) | 0 (0, 0) |  |
| **Any COPD-related outpatient visit, n (%)** | 2284 (56.0) | 4280 (44.9) | 1945 (47.6) | 4585 (48.1) | 0.9 |
| Number of COPD-related outpatient days, mean (SD) | 1.7 (3.5) | 1.6 (3.9) | 1.4 (3.4) | 1.7 (3.9) | 6.8 |
| Median (Q1, Q3) | 1 (0, 2) | 0 (0, 1) | 0 (0, 1) | 0 (0, 1) |  |
| **Any visits with a pulmonologist, n (%)** | 1553 (38.0) | 2156 (22.6) | 1113 (27.3) | 2594 (27.2) | 0.1 |
| **Prescription out-of-pocket costs for the index fill, mean $ (SD)a** | 103 (136) | 98 (130) | 98 (132) | 99 (131) | 0.7 |
| Median (Q1, Q3) | 48 (32, 103) | 49 (25, 104) | 48 (25, 100) | 50 (30, 104) |  |
| **Prescription out-of-pocket costs during baseline, mean $ (SD)b** | 659 (876) | 621 (919) | 640 (848) | 634 (943) | 0.7 |
| Median (Q1, Q3) | 412 (171, 847) | 390 (150, 750) | 403 (162, 819) | 395 (154, 767) |  |
| **Medicare Part D low-income subsidy during baseline, n (%)b** | 960 (23.5) | 2764 (29.0) | 1112 (27.2) | 2604 (27.3) | 0.2 |

aInflation-adjusted to 2018 USD using the prescription drug component of the Consumer Price Index; bamong Medicare enrollees.

ASD, absolute standardized difference; B/F, budesonide/formoterol; COPD, chronic obstructive pulmonary disease; ED, emergency department; EPO, exclusive provider organization; HMO, health maintenance organization; IPTW, inverse probability of treatment weighting; PDE-4, phosphodiesterase-4; POS, point of service; PPO, preferred provider organization; SABA, short-acting β2-agonist; SAMA, short-acting muscarinic antagonist; SD, standard deviation; UMEC/VI, umeclidinium/vilanterol; USD, United States Dollars.
